# Supplementary material for: Parkinson’s disease and cancer: a systematic review and meta-analysis on the influence of lifestyle habits, genetic variants, and gender
Source: publisher site journal article supplement (doi:10.18632/aging.203932), 2022-03-05
Supplement: Supplementary file [file aging-v14i5-203932-supplementary-material-SD2.pdf]

**SUPPLEMENTARY FIGURE**

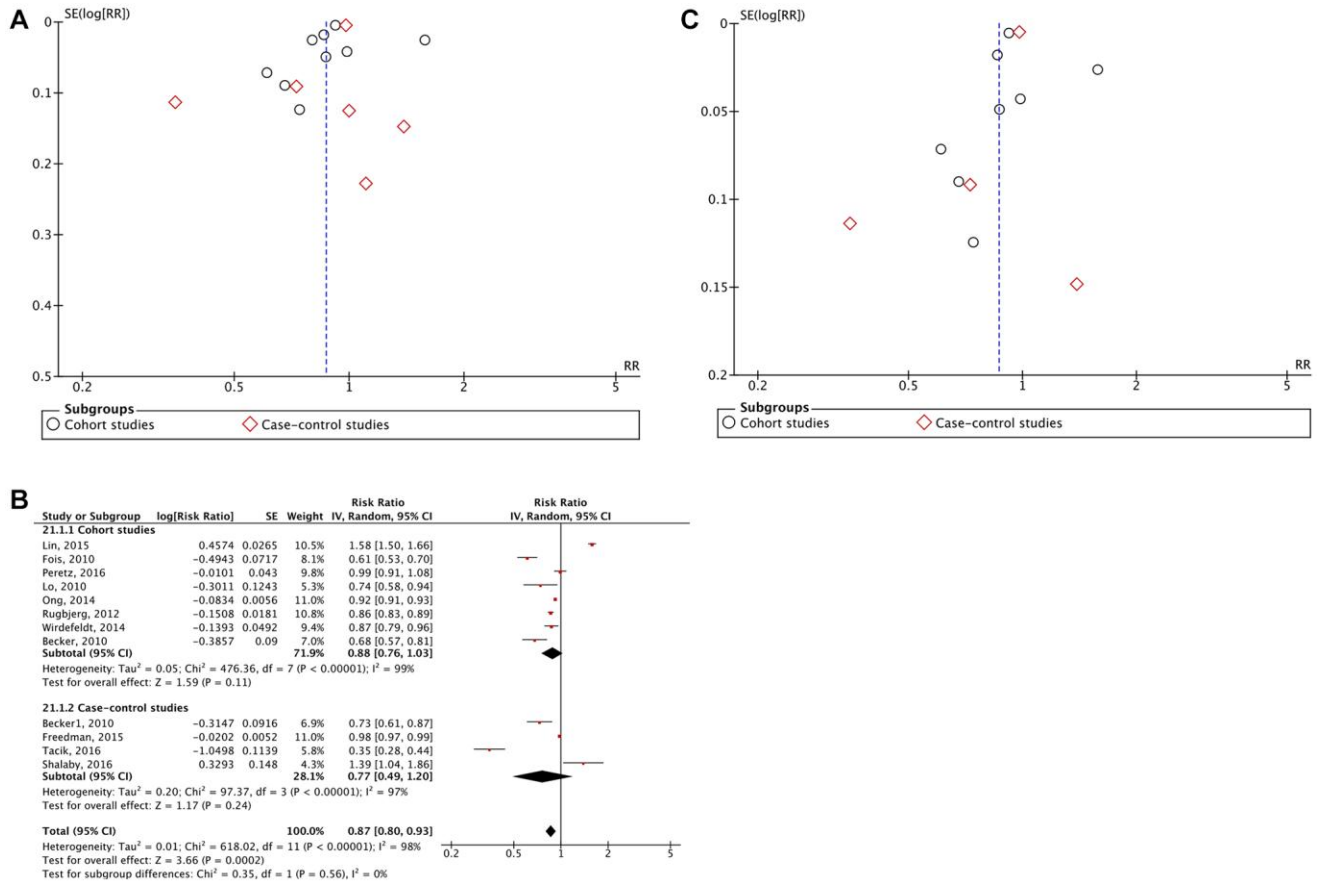

**Supplementary Figure 1.** (A) Funnel plot for assessment of publication bias in the included studies before sensitivity analysis. (B) Forest plot of the association between PD and relative risk of cancer in general, after sensitivity analysis. (C) Funnel plot of included studies after sensitivity analysis.
