# Supplementary material for: Parkinson’s disease and cancer: a systematic review and meta-analysis on the influence of lifestyle habits, genetic variants, and gender
Source: publisher site journal article supplement (doi:10.18632/aging.203932), 2022-03-05
Supplement: Supplementary file [file aging-v14i5-203932-supplementary-material-SD3.pdf]

## SUPPLEMENTARY TABLES

**Supplementary Table 1. QUOROM Statement checklist.**

| Heading             | Subheading                  | Descriptor                                                                                                                                                                                                                                                                                                                   | Reported?<br>(Y/N) | Page<br>Number   |
|---------------------|-----------------------------|------------------------------------------------------------------------------------------------------------------------------------------------------------------------------------------------------------------------------------------------------------------------------------------------------------------------------|--------------------|------------------|
| <b>Title</b>        |                             | Identify the report as a systematic review                                                                                                                                                                                                                                                                                   | Y                  | 1                |
| <b>Abstract</b>     |                             | Use a structured format                                                                                                                                                                                                                                                                                                      | Y                  | 2                |
|                     | Objectives                  | The clinical question explicitly                                                                                                                                                                                                                                                                                             | Y                  | 2                |
|                     | Data sources                | The databases (i.e., list) and other information sources                                                                                                                                                                                                                                                                     | Y                  | 2                |
|                     | Review methods              | The selection criteria (i.e., population, intervention, outcome, and study design); methods for validity assessment, data abstraction, and study characteristics, and quantitative data synthesis in sufficient detail to permit replication                                                                                 | Y                  | 2                |
|                     | Results                     | Characteristics of the RCTs included and excluded; qualitative and quantitative findings (i.e., point estimates and confidence intervals); and subgroup analyses                                                                                                                                                             | Y                  | 2                |
|                     | Conclusion                  | The main results                                                                                                                                                                                                                                                                                                             | Y                  | 2                |
| <b>Describe</b>     |                             |                                                                                                                                                                                                                                                                                                                              |                    |                  |
| <b>Introduction</b> |                             | The explicit clinical problem, biological rationale for the intervention, and rationale for review                                                                                                                                                                                                                           | Y                  | 3–4              |
| <b>Methods</b>      | Searching                   | The information sources, in detail (e.g., databases, registers, personal files, expert informants, agencies, hand-searching), and any restrictions (years considered, publication status, language of publication)                                                                                                           | Y                  | 17               |
|                     | Selection                   | The inclusion and exclusion criteria (defining population, intervention, principal outcomes, and study design)                                                                                                                                                                                                               | Y                  | 17–18            |
|                     | Validity assessment         | The criteria and process used (e.g., masked conditions, quality assessment, and their findings)                                                                                                                                                                                                                              | Y                  | 17–18            |
|                     | Data abstraction            | The process or processes used (e.g., completed independently, in duplicate)                                                                                                                                                                                                                                                  | Y                  | 17               |
|                     | Study characteristics       | The type of study design, participants' characteristics, details of intervention, outcome definitions, and how clinical heterogeneity was assessed                                                                                                                                                                           | Y                  | 19               |
|                     | Quantitative data synthesis | The principal measures of effect (e.g., relative risk), method of combining results (statistical testing and confidence intervals), handling of missing data; how statistical heterogeneity was assessed; a rationale for any a-priori sensitivity and subgroup analyses; and any assessment of publication bias             | Y                  | 20–21            |
| <b>Results</b>      | Trial flow                  | Provide a meta-analysis profile summarising trial flow (see figure)                                                                                                                                                                                                                                                          | Y                  | 7–10             |
|                     | Study characteristics       | Present descriptive data for each trial (e.g., age, sample size, intervention, dose, duration, follow-up period)                                                                                                                                                                                                             | Y                  | Refer to Table 1 |
|                     | Quantitative data synthesis | Report agreement on the selection and validity assessment; present simple summary results (for each treatment group in each trial, for each primary outcome); present data needed to calculate effect sizes and confidence intervals in intention-to-treat analyses (e.g., 2X2 tables of counts, means and SDs, proportions) | Y                  | Refer to Table 1 |
| <b>Discussion</b>   |                             | Summarise key findings; discuss clinical inferences based on internal                                                                                                                                                                                                                                                        | Y                  | 7–16             |

and external validity; interpret the results in light of the totality of available evidence; describe potential biases in the review process (e.g., publication bias); and suggest a future research agenda

**Supplementary Table 2. Papers excluded from primary analysis and the reasons for exclusion.**

| First author         | Reasons for rejection                                                                                                                |
|----------------------|--------------------------------------------------------------------------------------------------------------------------------------|
| Sun, 2011            | Overlapping database and time period, smaller group of patients and controls, fewer number of cancers studied compared to Lin (2015) |
| Tang, 2016           | Overlapping database and time period, fewer number of cancers studied compared to Lin (2015)                                         |
| Liao, 2015           | Overlapping database and time period, fewer number of cancers studied compared to Lin (2015)                                         |
| Lerman, 2018         | Overlapping database and time period, fewer number of cancers studied compared to Peretz (2016)                                      |
| Inzelberg, 2011      | Studied impact of PD on melanoma instead of cancer in general                                                                        |
| Bertoni, 2010        | Studied impact of PD on melanoma instead of cancer in general                                                                        |
| Boursi, 2016         | Studied impact of PD on colorectal cancer instead of cancer in general                                                               |
| Ryu, 2020            | Studied impact of PD on skin cancer instead of cancer in general                                                                     |
| Jespersen, 2016      | Studied impact of PD on prostate cancer instead of cancer in general                                                                 |
| Constantinescu, 2013 | Studied impact of PD on melanoma instead of cancer in general                                                                        |

**Supplementary Table 3. Characteristics of all studies included in the comparison between LRRK2-PD and idiopathic PD patients.**

| No. | Author                 | Study design | Country                    | Sample size                                                      | Females (%) | Mean age (SD) | Adjustment                                                                                                                                                                                                                                                                                      | Cancer (s) reported                                                                                                                                                                                                              |
|-----|------------------------|--------------|----------------------------|------------------------------------------------------------------|-------------|---------------|-------------------------------------------------------------------------------------------------------------------------------------------------------------------------------------------------------------------------------------------------------------------------------------------------|----------------------------------------------------------------------------------------------------------------------------------------------------------------------------------------------------------------------------------|
| 1   | Saunders-Pullman, 2010 | Cohort       | USA                        | 31 LRRK2-PD patients<br>132 iPD patients                         | 75 (46.0%)  | 70.2 (median) | Smoking, gender                                                                                                                                                                                                                                                                                 | Non-skin, renal, breast, lung, prostate, haematological, reproductive                                                                                                                                                            |
| 2   | Agalliu, 2019          | Case-control | Europe, Israel, USA        | 257 LRRK2-PD patients<br>712 iPD patients<br>218 non-PD controls | 553 (46.9%) | 67.3 (10.81)  | Age, sex, Ashkenazi Jews ethnicity (fixed effect) and study centre (random effect), smoking status, BMI                                                                                                                                                                                         | Cancer in general, skin, melanoma, head and neck, lung, esophageal, colon, liver, pancreatic, thyroid, kidney, bladder, brain, leukemia, lymphoma, hormone-related, breast, ovarian, endometrial, cervical, prostate, testicular |
| 3   | Warø, 2018             | Case-control | Norway                     | 103 LRRK2-PD patients<br>830 iPD patients                        | 361 (38.7%) | 71.2 (11.6)   | Age, sex                                                                                                                                                                                                                                                                                        | Colorectal, lung, breast, prostate, kidney, bladder, thyroid, lymphoma/haematologic, meningioma, non-skin, others unspecified                                                                                                    |
| 4   | Ruiz-Martínez, 2014    | Case-control | Spain                      | 95 LRRK2-PD patients<br>637 iPD patients<br>176 non-PD controls  | 448 (49.3)  | 71.2 (11.8)   | NR                                                                                                                                                                                                                                                                                              | Cancer in general, melanoma, lung, bladder, colon, kidney, breast, ovarian, prostate, hormonal, haematologic, meningioma, others unspecified                                                                                     |
| 5   | Inzelberg, 2012        | Case-control | Israel                     | 79 LRRK2-PD patients<br>411 iPD patients                         | 191 (39.0%) | 69.8 (11.1)   | Age                                                                                                                                                                                                                                                                                             | Cancer in general, lung, breast, prostate, colon, stomach, haematologic, reproductive, renal, skin, melanoma, non-melanoma skin, others unspecified                                                                              |
| 6   | Agalliu, 2015          | Case-control | Israel, Norway, Spain, USA | 177 LRRK2-PD patients<br>1372 iPD patients                       | 680 (43.9)  | 70.9 (10.8)   | Adjustment (1): Age at time of the first cancer diagnosis, or age at the last clinic visit<br><br>Adjustment (2): Age as fixed effect, study centre as random effect<br><br>Adjustment (3): Age and ethnicity (Ashkenazi Jewish vs. others) as fixed effects and study centre as random effects | Cancer in general, skin, melanoma, non-skin, lung, bladder, breast, ovarian, prostate, colon, kidney/renal, haematologic/lymphoma, meningioma                                                                                    |

Abbreviations: LRRK2: Leucine-rich repeat kinase 2; iPD: Idiopathic PD; NR: Not reported.

**Supplementary Table 4. Characteristics of all studies included in the comparison between female and male patients.**

| No. | Author         | Study design | Country | Sample size of PD patients                 | Mean age (SD) | Adjustment                                                                                                                                              | Cancer (s) reported                                                                                                                                                                                                                                                                                                                                                                       |
|-----|----------------|--------------|---------|--------------------------------------------|---------------|---------------------------------------------------------------------------------------------------------------------------------------------------------|-------------------------------------------------------------------------------------------------------------------------------------------------------------------------------------------------------------------------------------------------------------------------------------------------------------------------------------------------------------------------------------------|
| 1   | Sun, 2011      | Cohort       | Taiwan  | 2395 females (48.3%)<br>2562 males (51.7%) | 63.5 (20.5)   | Model 1: Unadjusted<br>Model 2: Adjusted for age, sex, occupation<br>Model 3: Adjusted for age, sex, occupation, HTN, DM, hyperlipidemia, heart disease | Cancer in general                                                                                                                                                                                                                                                                                                                                                                         |
| 2   | Peretz, 2016   | Cohort       | Israel  | 3297 females (46.3%)<br>3828 males (53.7%) | 71.3 (10.6)   | Age, chronological year, sex                                                                                                                            | Cancer in general, breast, colon, CNS, kidney, leukemia, lung. Lymphoma, melanoma, ovary, pancreas, prostate, rectum, thyroid                                                                                                                                                                                                                                                             |
| 3   | Liat, 2014     | Cohort       | UK      | 94254 females (43%)<br>124940 males (57%)  | NR            | NR                                                                                                                                                      | Cancer in general, bladder, bone, brain, breast, cervix, colon, upper GI, kidney, larynx, lymphoid leukemia, myeloid leukemia, liver, lung, Hodgkin's lymphoma, non-Hodgkin's lymphoma, malignant melanoma, multiple myeloma, nasopharynx, meninges, oesophageal, ovarian, pancreatic, prostate, rectum, salivary gland, non-melanoma skin cancer, stomach, testis, thyroid, uterine body |
| 4   | Rugbjerg, 2012 | Cohort       | Denmark | 9631 females (47%)<br>10712 males (53%)    | NR            | NR                                                                                                                                                      | Cancer in general, malignant melanoma, nonmelanoma skin cancer, buccal cavity, stomach, colorectal, liver, lung, urinary bladder, myeloid leukemia, gallbladder/biliary tract, brain, non-Hodgkin lymphoma, multiple myeloma, lymphatic leukemia                                                                                                                                          |

Abbreviations: HTN: Hypertension; DM: Diabetes mellitus; NR: Not reported.

**Supplementary Table 5A. Risk of bias analysis for cohort studies.**

| Author                    | Selection                            |                                     | Comparability             |                                                                          | Exposure                                                                                                                      |                                                                                 | Total quality score                                                                                                                                             | Quality rank |                                                 |
|---------------------------|--------------------------------------|-------------------------------------|---------------------------|--------------------------------------------------------------------------|-------------------------------------------------------------------------------------------------------------------------------|---------------------------------------------------------------------------------|-----------------------------------------------------------------------------------------------------------------------------------------------------------------|--------------|-------------------------------------------------|
|                           | Representativeness of exposed cohort | Selection of the non-exposed cohort | Ascertainment of exposure | Demonstration that outcome of interest was not present at start of study | Comparability of cohorts on the basis of the design or analysis                                                               | Assessment of outcome                                                           |                                                                                                                                                                 |              | Was follow-up long enough for outcomes to occur |
| Lin, 2015                 | *                                    | *                                   | *                         | *                                                                        | ** (age, sex, index year)                                                                                                     | *(National Cancer Registry Database + follow-up)                                | *(Until diagnosis of malignant disease, death, lost to follow-up, withdrew from database, until end of study date)                                              | 8            | Good                                            |
| Peretz, 2016              | *                                    | *                                   | *                         | *                                                                        | *(age, sex)                                                                                                                   | *(MHS cancer registry)                                                          | *(Until death, leaving HMO, study closure, ~10y to reflect onset of motor symptoms and diagnosis)                                                               | 6            | Good                                            |
| Park, 2019                | *                                    | *                                   | *                         | *                                                                        | ** (age and sex)                                                                                                              |                                                                                 | *(Followed up for cancer development until 2016, from 2010)                                                                                                     | 7            | Poor                                            |
| Liat, 2014                | *                                    | *                                   | *                         | *                                                                        | ** (age, sex, calendar year of 1st recorded admission, region of residence, quintile of patients' Index of Deprivation score) | *(Search for malignant cancer using ICD records and individual cancer outcomes) | *(1 Jan 1999–31 Dec 2011)                                                                                                                                       | 8            | Good                                            |
| Rugbjerg, 2012            | *                                    | *                                   | *                         | *                                                                        | ** (age, sex, calendar period)                                                                                                | *(Danish Cancer Registry)                                                       | *(From 1/1/1977–2008)                                                                                                                                           | 7            | Good                                            |
| Wirdefeldt, 2014          | *                                    | *                                   | *                         | *                                                                        | ** (birth year, sex)                                                                                                          | *(Swedish Cancer Register)                                                      | *(1958–2009)                                                                                                                                                    | 7            | Good                                            |
| Becker, 2010 <sup>1</sup> | *                                    | *                                   | *                         | *                                                                        | ** (Age, gender, general practice, diagnosis date, years of history in the GPRD prior to diagnosis date)                      | *                                                                               | *(accumulated person-time until patient developed an incident cancer diagnosis, died, the medical record ended, or end of study was reached – 31 December 2005) | 8            | Good                                            |
| Fois, 2010                | *                                    | *                                   | *                         | *                                                                        | *(age at entry, sex, calendar year of 1st recorded admission, interval from study entry and district of residence)            | *(ORLS database)                                                                | *(date of subsequent admission for cancer, death, or 31 March 1999)                                                                                             | 7            | Good                                            |
| Lo, 2010                  | *                                    | *                                   | *                         | *                                                                        | *(birth year, gender, respondent type)                                                                                        | *(KPNCCR database)                                                              | *(from time of 1st membership to 29 February 2008)                                                                                                              | 7            | Good                                            |

<sup>1</sup>Both case-control and cohort studies were conducted.

**Supplementary Table 5B. Risk of bias analysis for case-control studies.**

| Author                    | Selection                        |                                 |                                        | Comparability          |                                     | Exposure                                                              |                                                     |                   | Total quality score | Quality rank |
|---------------------------|----------------------------------|---------------------------------|----------------------------------------|------------------------|-------------------------------------|-----------------------------------------------------------------------|-----------------------------------------------------|-------------------|---------------------|--------------|
|                           | Is the case definition adequate? | Representativeness of the cases | Selection of controls                  | Definition of controls | Comparability of cases and controls | Ascertainment of exposure                                             | Same method of ascertainment for cases and controls | Non-response rate |                     |              |
| Freedman, 2015            | *                                | *                               | *                                      | *                      | ** (age and sex)                    | *(ICD codes used)                                                     | *                                                   |                   | 8                   | Good         |
| Tacik, 2016               | *                                | *                               |                                        | *                      | ** (age and sex)                    | *(UKPDSBB, Mayo Clinic specialists)                                   | *                                                   |                   | 7                   | Good         |
| Shalaby, 2016             | *                                | *                               | *                                      | *                      | ** (age and sex)                    | *(CUMC, published diagnostic criteria)                                | *                                                   |                   | 8                   | Good         |
| Becker, 2010 <sup>1</sup> | *                                | *                               | *                                      | *                      | ** (age, gender, calendar time)     | *(records and codes)                                                  | *                                                   |                   | 8                   | Good         |
| Agalliu, 2019             | *                                | *                               | *                                      |                        | ** (age, ethnicity)                 | (self-reported questionnaire)                                         | *                                                   |                   | 6                   | Poor         |
| Ruiz-Martínez, 2014       | *                                | *                               | (Spouses and caregivers of PD patient) | *                      |                                     | *(Cancer Registry from Department of Health of the Basque Government) | *                                                   |                   | 4                   | Poor         |

<sup>1</sup>Both case-control and cohort studies were conducted.

**Supplementary Table 6A. Cancer subtypes and number of PD patients included in each cancer group in the primary analysis.**

| Cancer group              | Cancers included <sup>1</sup>                                                                                                                   | Number of PD patients |
|---------------------------|-------------------------------------------------------------------------------------------------------------------------------------------------|-----------------------|
| Cancer in general         | –                                                                                                                                               | 372537                |
| Brain                     | Brain, malignant brain, benign brain                                                                                                            | 307706                |
| Colon, rectal, colorectal | Colorectal, colon, rectal                                                                                                                       | 373523                |
| Lung                      | Lung, lung and bronchus                                                                                                                         | 373415                |
| Melanoma                  | Malignant melanoma <i>in situ</i> , malignant melanoma, malignant melanoma of skin invasive malignant melanoma, unclassified melanoma, melanoma | 389257                |
| Oral cavity               | Oral cavity, pharynx, lip, oral cavity and pharyngeal, buccal cavity and pharynx, oral cavity/pharynx                                           | 76815                 |

**Supplementary Table 6B. Cancer subtypes and number of PD patients included in each cancer group in the genetic analysis.**

| Cancer group              | Cancers included <sup>1</sup>                                                                | Number of PD patients |               |
|---------------------------|----------------------------------------------------------------------------------------------|-----------------------|---------------|
|                           |                                                                                              | LRRK2-PD              | Idiopathic PD |
| Cancer in general         | –                                                                                            | 742                   | 4094          |
| Breast                    | Breast                                                                                       | 742                   | 4094          |
| Brain                     | Brain, meningioma                                                                            | 632                   | 3551          |
| Colon, rectal, colorectal | Colorectal, colon                                                                            | 711                   | 3962          |
| Haematological            | Hematological, leukemia, lymphoma, lymphoma/haematologic, haematologic, hematologic/lymphoma | 742                   | 4094          |

**Supplementary Table 6C. Cancer subtypes and number of PD patients included in each cancer group in the gender analysis.**

| Cancer group      | Cancers included <sup>1</sup>                                                                                          | Number of PD patients |        |
|-------------------|------------------------------------------------------------------------------------------------------------------------|-----------------------|--------|
|                   |                                                                                                                        | Female                | Male   |
| Cancer in general | –                                                                                                                      | 107182                | 139480 |
| Bladder           | Bladder, urinary bladder                                                                                               | 103885                | 135652 |
| Colon             | Colon, colorectal                                                                                                      | 97551                 | 128768 |
| Haematological    | Leukemia, lymphoma, Hodgkin's lymphoma, non-Hodgkin's lymphoma, myeloid leukemia, lymphatic leukemia, multiple myeloma | 107182                | 139480 |
| Liver             | Liver                                                                                                                  | 103885                | 135652 |
| Lung              | Lung                                                                                                                   | 107182                | 139480 |
| Rectal            | Rectum                                                                                                                 | 97551                 | 128768 |
| Renal             | Kidney                                                                                                                 | 97551                 | 128768 |
| Stomach           | Stomach                                                                                                                | 103885                | 135652 |

<sup>1</sup>These cancer subtypes are quoted as they appeared in the original shortlisted studies.
